# Supplementary material for: Model-Informed Repurposing of Medicines for SARS-CoV-2: Extrapolation of Antiviral Activity and Dose Rationale for Paediatric Patients
Source: MDPI journal article supplement (doi:10.3390/pharmaceutics13081299), 2021-08-19
Supplement: s1 [file s1]

# Supplementary Materials: Model-Informed Repurposing of Medicines for SARS-CoV-2: Extrapolation of Antiviral Activity and Dose Rationale for Paediatric Patients

Federico Romano, Salvatore D'Agate, and Oscar Della Pasqua

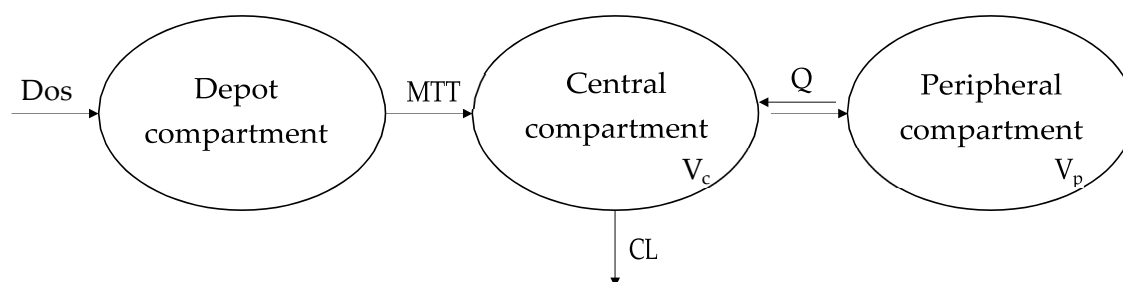

**Figure S1.** Compartmental pharmacokinetic model of chloroquine.

**Table S1.** Population pharmacokinetic model parameter estimates for chloroquine (CQ).

| Parameter         | Estimate |
|-------------------|----------|
| MTT (h)           | 0.773    |
| CL/F (L/h)        | 6.13     |
| $V_c/F$ (L)       | 468      |
| $V_p/F$ (L)       | 1600     |
| $Q/F$ (L/h)       | 37.7     |
| $t_{1/2}$ (days)  | 10.7     |
| $\omega^2_{V_p}$  | 20.0     |
| $\omega^2_F$      | 19.4     |
| $\sigma^2_{prop}$ | 0.401    |

Table adapted from Höglund et al. [1]. MTT mean transit time of the absorption, CL/F apparent clearance of CQ,  $V_c/F$  apparent volume of distribution for CQ central compartment,  $V_p/F$  apparent volume of distribution for CQ peripheral compartment,  $Q/F$  apparent intercompartmental clearance for CQ,  $t_{1/2}$  half-life of CQ.  $\omega$ , inter-individual variance;  $\sigma^2$ , intra-individual variance.

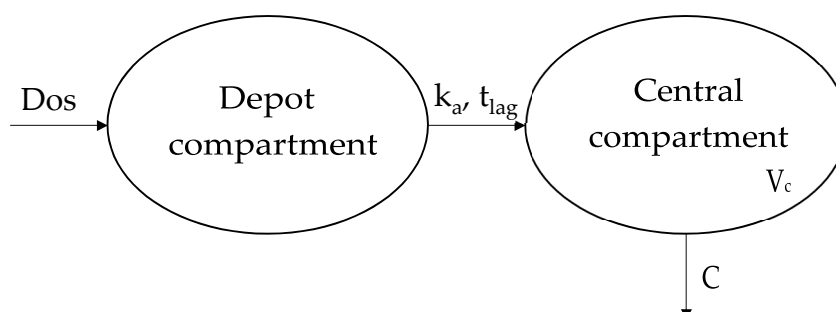

**Figure S2.** Compartmental pharmacokinetic model of hydroxychloroquine in whole blood.

**Table S2.** Population pharmacokinetic model parameter estimates for hydroxychloroquine in whole blood.

| Parameter          | Estimate |
|--------------------|----------|
| CL (L/h)           | 9.89     |
| V (L)              | 605      |
| $k_a$ ( $h^{-1}$ ) | 0.765    |
| $t_{lag}$ (h)      | 0.445    |
| F                  | 0.746    |
| $k_p$              | 29       |
| $\omega^2_{CL}$    | 0.127    |
| $\omega^2_V$       | 0.25     |
| $\omega^2_{k_a}$   | 0.94     |
| $\sigma^2_{prop}$  | 0.044    |
| $\sigma^2_{add}$   | 365      |

Table adapted from Carmichael et al. [2] CL, clearance; V, volume of distribution;  $k_a$ , absorption rate constant;  $t_{lag}$ , absorption lag constant; F, bioavailability;  $k_p$ , blood:lung ratio found in Chhonker et al. [3];  $\omega^2$ , inter-individual variance;  $\sigma^2$ , intra-individual variance. This model was used to extrapolate lung concentration using the blood:lung ratio parameter and to assess drug efficacy.

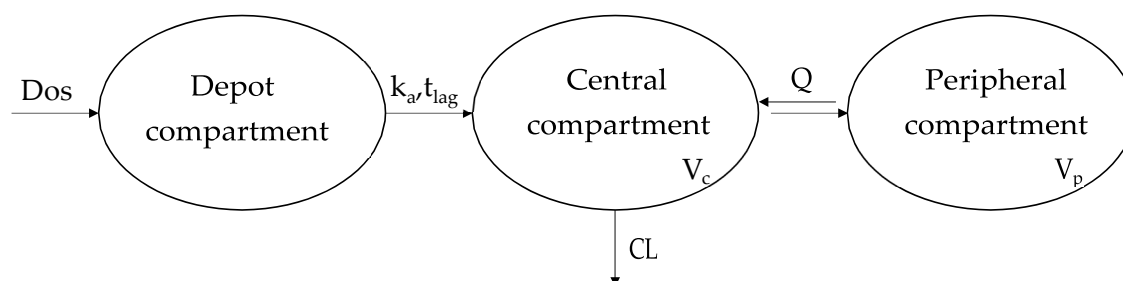

**Figure S3.** Compartmental pharmacokinetic model of hydroxychloroquine in plasma.

**Table S3.** Population pharmacokinetic model parameter estimates for hydroxychloroquine in plasma.

| Parameter            | Estimate |
|----------------------|----------|
| CL (L/h)             | 10.9     |
| $V_c$ (L)            | 437      |
| $k_a$ ( $h^{-1}$ )   | 1.15     |
| $t_{lag}$ (h)        | 0.389    |
| Q (L/h)              | 45.1     |
| $V_p$ (L)            | 1390     |
| $\omega^2_{CL}$      | 0.161    |
| $\omega^2_{V_c}$     | 0.232    |
| $\omega^2_{V_p}$     | 0.715    |
| $\omega^2_{t_{lag}}$ | 0.0359   |
| $\sigma^2_{prop}$    | 0.0729   |
| $\sigma^2_{add}$     | 7.7      |

Table adapted from Lim et al. [4] CL, clearance;  $V_c$ , volume of distribution of the central compartment;  $k_a$ , absorption rate constant;  $t_{lag}$ , absorption lag time ; Q, intercompartmental clearance;  $V_p$ , volume of distribution of the peripheral compartment;  $\omega^2$ , interindividual variance;  $\sigma^2$ , intra-individual variance. This model was used to assess safety threshold for systemic exposure.

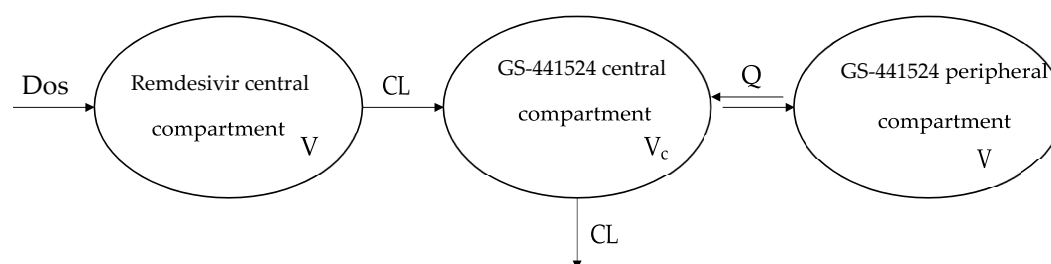

**Figure S4.** Compartmental pharmacokinetic model of remdesivir.

**Table S4.** Population pharmacokinetic model parameter estimates for remdesivir (RDV) in plasma.

| Parameter                    | Estimate |
|------------------------------|----------|
| CL RDV (L/h)                 | 68.5     |
| CL GS-441524 (L/h)           | 13.6     |
| V RDV (L)                    | 32.1     |
| V <sub>c</sub> GS-441524 (L) | 74.3     |
| Q GS-441524 (L/h)            | 22.7     |
| V <sub>p</sub> GS-441524 (L) | 78.6     |
| Proportional RUV (%)         | 13.7     |

Pharmacokinetic parameters: CL, clearance; V<sub>c</sub>, volume of distribution of the central compartment; Q, intercompartmental clearance; V<sub>p</sub>, volume of distribution of the peripheral compartment;  $\omega^2$ , interindividual variance;  $\sigma^2$ , intra-individual variance.

To assess the predictive performance of the pharmacokinetic model, including modelling and extrapolation assumptions for chloroquine and hydroxychloroquine, blood concentrations at day 7 were compared with data reported by Ursing et al. [5]. Median area under the concentration vs. time curve over the treatment period (AUC<sub>0–168</sub>), maximum concentration (C<sub>max</sub>), steady state concentration (C<sub>ss</sub>) and trough concentration (C<sub>min</sub> or C<sub>tau</sub>) in plasma and lung were derived when possible. Plasma concentrations were derived by taking into account the blood-to-plasma ratio [6].

**Table S5.** Chloroquine: Model-predicted vs observed concentrations in paediatric patients.

| Drug | Regimen | Model predictions *                      |                                |                                            |                                             | Reported data                                       |
|------|---------|------------------------------------------|--------------------------------|--------------------------------------------|---------------------------------------------|-----------------------------------------------------|
|      |         | Median lung AUC <sub>0–168</sub> (mgh/L) | Plasma C <sub>max</sub> (mg/L) | Median plasma AUC <sub>0–168</sub> (mgh/L) | Median blood concentrations on day 7 (mg/L) | Blood concentrations (mg/L) on day 7 <sup>a,b</sup> |
| CQ   | Total   | 4762                                     | 0.23                           | 19.2                                       | 0.35                                        | 0.1–0.32                                            |
|      | 25mg/kg | (3253–6888)                              | (0.2–0.36)                     | (12.8–27.2)                                | (0.25–0.53)                                 |                                                     |
|      | Total   | 9397                                     | 0.42                           | 37.6                                       | 0.77                                        | 0.19–0.79                                           |
|      | 50mg/kg | (6511–13322)                             | (0.28–0.63)                    | (26.4–53.6)                                | (0.53–1.1)                                  |                                                     |

<sup>a</sup> IQR–interquartile range; <sup>b</sup> Clinical data set reference for 2–14 year old children, based on a maximum weight of 29 kg–Ursing et al. [5]; \* Values computed over 963 virtual paediatric subjects, ranging from 2–18 years postnatal age; Values between parentheses represent the 95% confidence intervals.

**Table S6.** Hydroxychloroquine: Model-predicted concentrations in paediatric patients.

| Drug | Regimen       | Model-predictions *              |            |            |                                                |                                            |          |
|------|---------------|----------------------------------|------------|------------|------------------------------------------------|--------------------------------------------|----------|
|      |               | Median lung concentration (mg/L) |            |            | Median plasma C <sub>max</sub> (mg/L) on Day 1 | Median plasma AUC <sub>0–168</sub> (mgh/L) |          |
|      |               | Day 1                            | Day 3      | Day 7      |                                                |                                            |          |
| HCQ  | Short dose    | 22.9                             | 20.2       | 3.5        | 1.2                                            | 80                                         | (39–157) |
|      |               | (11.0–42.9)                      | (7.6–41.1) | (0.0–15.5) | (0.7–2.3)                                      | (1418–5360)                                |          |
|      | Extended dose | 23.5                             | 15.1       | 11.5       | 1.2                                            | 83                                         | (46–164) |
|      |               | (11.6–44.4)                      | (4.5–29.7) | (3.6–25.3) | (0.7–2.3)                                      | (1685–5538)                                |          |

\* Values computed over 963 virtual paediatric subjects, ranging from 2–18 years postnatal age; Values between parentheses represent the 95% confidence intervals.

For remdesivir, model predictions were compared to the values reported in [7]. This evaluation is based on a regimen including a 200 mg IV dose (infused over 30 min) on Day 1 and 100 mg for 9 subsequent days once daily (infused over 30 min). AUC was derived after the first 200 mg dose.  $C_{max}$  and  $C_{tau}$  were calculated at steady state after a 100 mg dose.

**Table S7.** Remdesivir metabolite (GS441524): Model-predicted vs observed secondary PK parameters in adults [3].

| Drug      | Regimen | Parameter    | Predicted mean *<br>(ng/mL) | Reported mean<br>(ng/mL) [CV%] |
|-----------|---------|--------------|-----------------------------|--------------------------------|
| GS-441524 | 200 mg  | $AUC_{0-24}$ | 842 (443–1398)              | 2190 [19]                      |
|           | 100 mg  | $C_{max,ss}$ | 56 (27–101)                 | 145 [19]                       |
|           |         | $C_{tau,ss}$ | 15 (4–35)                   | 69 [18]                        |

\* Values computed over 963 virtual paediatric subjects, ranging from 2–18 years postnatal age. Values between parentheses represent the 95%-confidence.

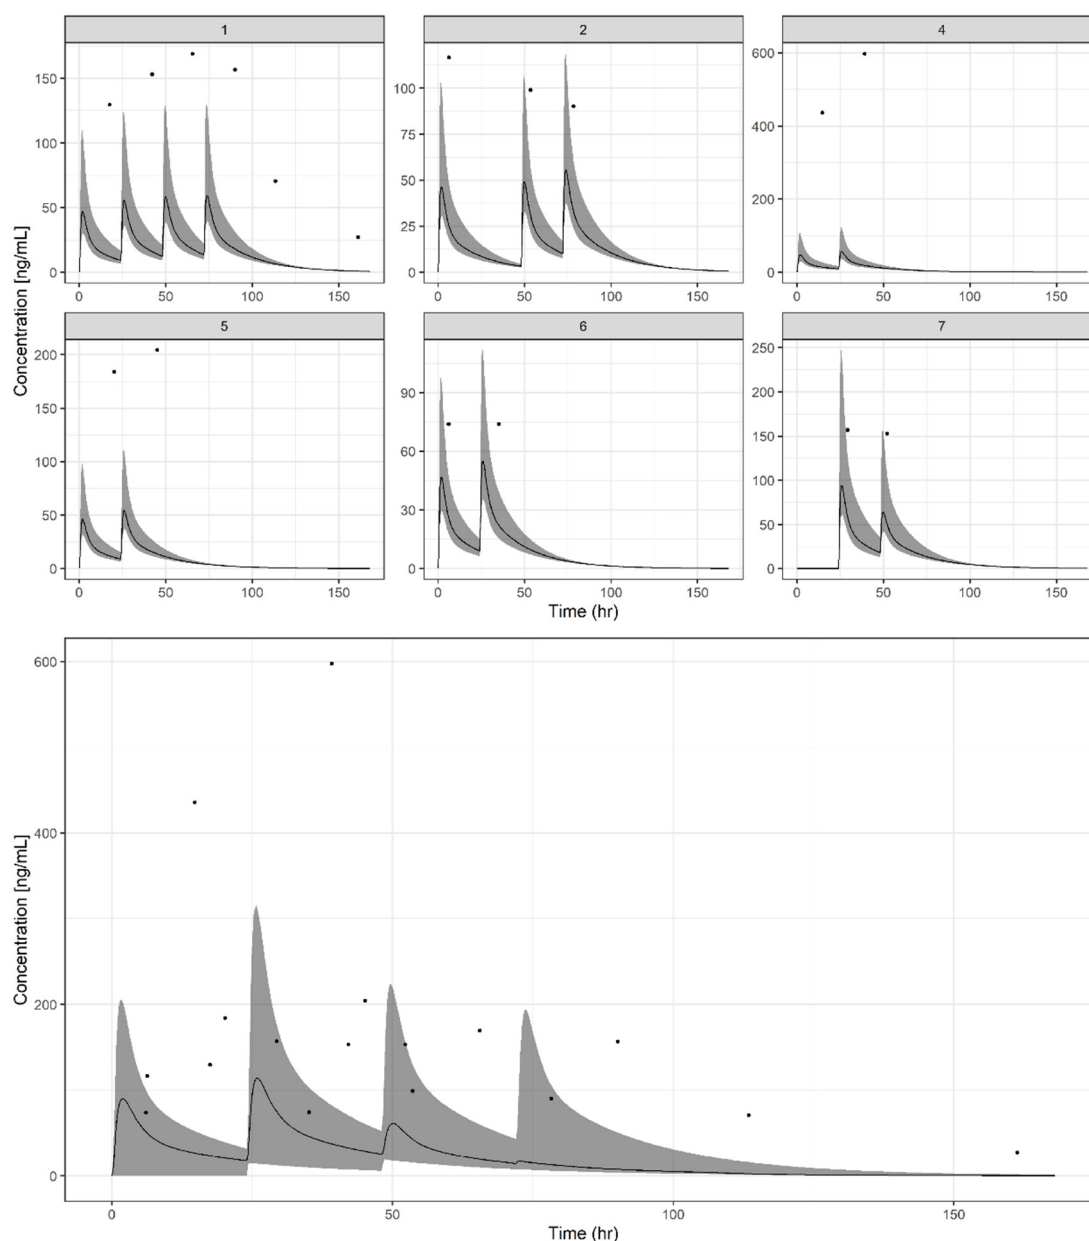

**Figure S5.** Comparison between model predictions and previously reported remdesivir concentrations in adults.

Visual predictive checks show the comparison between model predicted median concentrations (black line) and the corresponding 95% confidence intervals (grey area). Observed data are depicted by the black dots [8]. Model predictions were based on 1000 simulations. Subjects in the data set were assigned a body weight randomly sampled from a normal distribution with a mean of 70 kg and standard deviation of 20 kg.

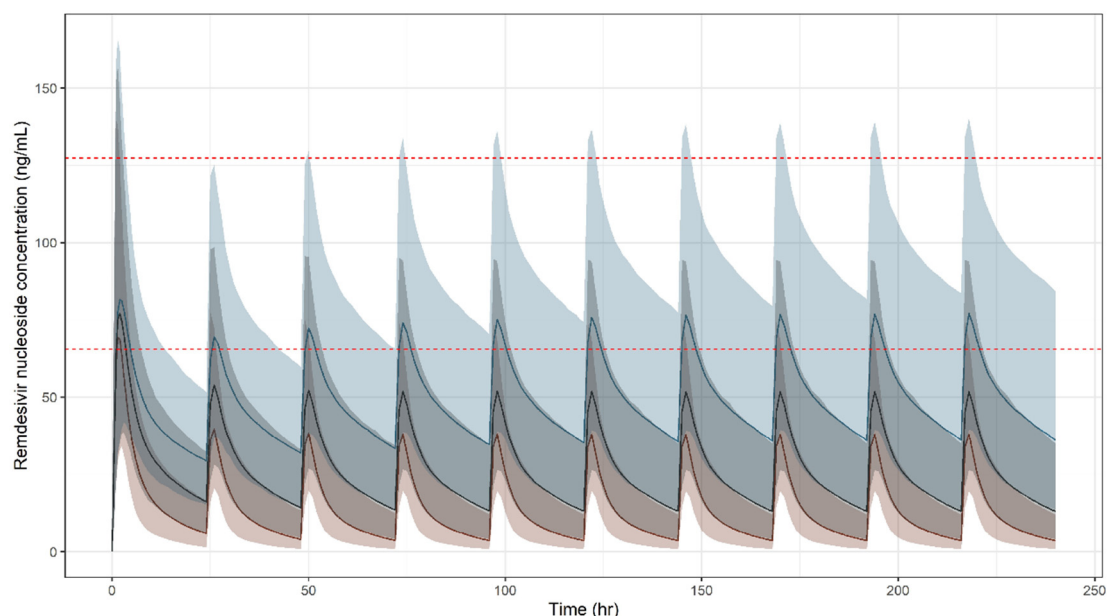

**Figure S6.** Sensitivity analysis: model predictions in adults for different case scenarios.

GS-441524 concentration vs. time profile in adults receiving 200 mg RDV on day 1 followed by 100 mg daily for 9 days. Grey line and shaded area represent the median and 95% confidence intervals (CI) obtained using the model estimates extrapolated from rhesus macaques. Blue and brown lines show the median obtained using, respectively, model estimates with elimination rate constant 2-fold smaller and larger than the value extrapolated by allometric scaling of preclinical data. Red dotted lines represent the 95% CI of previously reported state concentrations ( $C_{ss}$ ) in adults [7]. Shaded area depicts the 95% CI.

**Table S8.** Remdesivir metabolite (GS-441524): Model-predicted secondary PK parameters in children.

| Drug      | Model predictions *                                               |                                                  | Reported data                                    |
|-----------|-------------------------------------------------------------------|--------------------------------------------------|--------------------------------------------------|
|           | Median plasma AUC <sub>0-24</sub> ( $\mu\text{M}\times\text{h}$ ) | Median plasma C <sub>max</sub> ( $\mu\text{M}$ ) | Median plasma C <sub>min</sub> ( $\mu\text{M}$ ) |
| GS-441524 | 2.891 (1.404–5.672)                                               | 0.280 (0.141–0.484)                              | 0.053 (0.014–0.153)                              |

\* Values computed over 963 virtual paediatric subjects, ranging from 2–18 years postnatal age. AUC, C<sub>max</sub> and C<sub>min</sub> were calculated at steady state. Values between parentheses represent the 95% confidence intervals.

**Table S9.** Remdesivir metabolite (GS-441524). Sensitivity analysis: model-predicted secondary PK parameters in children for different case scenarios.

| Scenario                                   | Model predictions *                                               |                                                  | Reported data                                    |
|--------------------------------------------|-------------------------------------------------------------------|--------------------------------------------------|--------------------------------------------------|
|                                            | Median plasma AUC <sub>0-24</sub> ( $\mu\text{M}\times\text{h}$ ) | Median plasma C <sub>max</sub> ( $\mu\text{M}$ ) | Median plasma C <sub>min</sub> ( $\mu\text{M}$ ) |
| Elimination rate constant (2-fold larger)  | 1.445 (0.702–2.837)                                               | 0.225 (0.106–0.400)                              | 0.013 (0.002–0.050)                              |
| Elimination rate constant (2-fold smaller) | 5.781 (2.808–11.202)                                              | 0.407 (0.209–0.694)                              | 0.158 (0.056–0.376)                              |

\*Values computed over 963 virtual paediatric subjects, ranging from 2–18 years postnatal age. AUC, C<sub>max</sub> and C<sub>min</sub> were calculated at steady state. Values between parentheses represent the 95% confidence intervals. Variations in metabolite formation rate did not produce any clinically significant difference.

**Table S10.** Remdesivir metabolite (GS441524). Sensitivity analysis: probability of target attainment for different case scenarios.

| Scenario *                                    | Probability of target attainment (%) |                  |                  |                  |
|-----------------------------------------------|--------------------------------------|------------------|------------------|------------------|
|                                               | IC <sub>50</sub>                     | IC <sub>85</sub> | IC <sub>90</sub> | IC <sub>95</sub> |
| Elimination rate constant<br>(2-fold larger)  | 100                                  | 56               | 12               | 0                |
| Elimination rate constant<br>(2-fold smaller) | 100                                  | 100              | 99               | 74               |

\* Variations in metabolite formation rate did not produce any clinically significant difference.

**Table S11.** NONMEM control stream file for the simulation of chloroquine concentrations in blood.

```

$PROBLEM 1 ; 1 comp CQ,1 comp DECQ – Control stream includes compartments describing CQ
metabolite (DEC), which was not included in the final analysis.
$INPUT ID TIME DV MDV EVID ARM WT CMT AMT II ADDL DOSE
$DATA Paediatric_dosing.csv IGNORE=#
$SUBROUTINE ADVAN5 TRANS1; TOL=6
$MODEL
COMP=(1) ; Absorption compartment
COMP=(2) ; Central compartment CQ
COMP=(3) ; Central compartment DEC
COMP=(4) ; Peripheral compartment DEC
COMP=(5) ; Peripheral compartment CQ
COMP=(6) ; Transit compartment
$PK
TVQ2 = THETA(1) * (WT/70)**0.75;
TVV2 = THETA(2) * (WT/70)**1
TVCL = THETA(3) * (WT/70)**0.75
TVV3 = THETA(4) * (WT/70)**1;
TVMT = THETA(5) ;
TVQ = THETA(6) * (WT/70)**0.75 ;
TVV4 = THETA(7) * (WT/70)**1;
TVV5 = THETA(8) * (WT/70)**1;
TVQ1 = THETA(11) * (WT/70)**0.75;
TVF1 = THETA(12);
Q2 = TVQ2* EXP(ETA(1)) ;
V2 = TVV2* EXP(ETA(2))
CL = TVCL* EXP(ETA(3)) ;
V3 = TVV3* EXP(ETA(4)) ;
MT = TVMT* EXP(ETA(5)) ;
Q = TVQ * EXP(ETA(6)) ;
V4 = TVV4* EXP(ETA(7)) ;
V5 = TVV5* EXP(ETA(8)) ;
CLM = 0.176*Q2
Q1 = TVQ1* EXP(ETA(9)) ;
F1 = TVF1* EXP(ETA(11)) ;

```

---

nn=1 ; calculating KTR based on the MTT estimates, nn=the number of transit compartments

KTR = (nn+1)/MT

K16 = KTR

K62 = KTR

K20 = Q2/V2

K30 = CL/V3

K24 = Q/V2

K42 = Q/V4

K23 = CLM/V2

K35 = Q1/V3

K53 = Q1/V5

S2=V2

S3=V3

\$ERROR

IPRED = A(2)/V2

W = THETA(9)

;Metabolite error model

IF(CMT.EQ.3) THEN

IPRED = A(3)/V3

W = THETA(10)

ENDIF

IPRED=IPRED

IRES = DV - IPRED

IWRES = IRES/W

Y = IPRED + W\*EPS(1)

\$THETA

(0, 6.13) ; (1.CL/F L/h CQ (Q2))

(0, 469) ; (2 V2/F L)

(0, 2.05) ; (3.CLM/F L/h M (CL))

(0, 2.31) ; (4.V3/F L M)

(0, 0.945) ; (5.MT /h)

(0, 37.8) ; (6.Q /L/h (parent))

(0, 1600) ; (7.V4 L)

(0, 258) ; (8. V5)

(0, 0.396) ; (9.Add (prop) error)

(0, 0.428) ; (10.Add (prop) error)

(0, 1.46) ; (11. Q (metabolite))

(1) FIX ;

\$OMEGA

0 FIX

0 FIX

0 FIX

0.129

---

---

```

0 FIX
0 FIX
0.0375
0.566
0 FIX
1 FIX
0.0381
$SIGMA 1 FIX
$SIM ONLYSIM (2345) NSUBPROBLEMS=1
$TABLE ID TIME CMT IPRED IRES IWRES CWRES MDV NOPRINT ONEHEADER FILE=sdtabPaed

```

---

**Table S12.** NONMEM control stream file for the simulation of hydroxychloroquine concentrations in blood.

---

```

$PROBLEM PK
$INPUT ID TIME DV MDV AGE SEX WT HT BMI HCT AMT II ADDL CMT
$DATA HCQ_dataset_children_standard_treatment_base.csv IGNORE=@
$SUBROUTINES ADVAN6 TOL=3
$ABBREVIATED COMRES=1
$MODEL COMP=(ABS, DEFDOSE) COMP=(CENTRAL, DEFOBS) COMP=(AUC)
$PK
CL = THETA(1)*(WT/70)**0.75*EXP(ETA(1))
V = THETA(2)*(WT/70)*EXP(ETA(2))
KA = THETA(3)*EXP(ETA(3))
ALAG1 = THETA(4)
F1 = THETA(5)
S2 = V/1000
IF (NEWIND.LE.1) COM(1)=-1
$DES
DADT(1) = -KA*A(1)
DADT(2) = KA*A(1) - CL/V*A(2)
DADT(3) = A(2)
$ERROR
CP = A(2)/S2
IF (CP.GT.COM(1)) COM(1)=CP
CMAX = COM(1)
AUC = A(3)/S2
IPRED = F
W = SQRT(THETA(6)**2*IPRED**2 + THETA(7)**2)
Y = IPRED + W*EPS(1)
IRES = DV-IPRED
IWRES = IRES/W
$THETA
(0, 9.89) ; CL
(0, 605) ; V
(0, 0.765) ; KA

```

---



---

```

(0, 0.445) ; ALAG1
(0, 0.746) ; F1
(0, 0.209) ; Prop.RE (sd)
(0, 19.104) ; Add.RE (sd)
$OMEGA
(0.127) ; IIV CL
(0.25) ; IIV V
(0.94) ; IIV KA
$SIGMA
1 FIX ; Proportional error PK
$SIM (12345) (54321) ONLYSIM NSUB=1
$TABLE ID TIME DV MDV IPRED CWRES AGE SEX WT HT BMI HCT V CL CMAX CMT AUC ONE-
HEADER
NOPRINT FILE=sdtab0032

```

---

**Table S13.** NONMEM control stream file for the simulation of hydroxychloroquine concentrations in plasma.

---

```

$PROBLEM PK
$INPUT ID TIME DV MDV AGE SEX WT HT BMI HCT AMT II ADDL CMT
$DATA HCQ_dataset_children_standard_treatment_base.csv IGNORE=@
$SUBROUTINES ADVAN6 TOL=3
$MODEL COMP=(ABS, DEFDOSE) COMP=(CENTRAL, DEFOBS) COMP=(PERIPH) COMP=(AUC)
$PK
CL = THETA(1)*(WT/70)**0.75*EXP(ETA(1))
V2 = THETA(2)*(WT/70)*EXP(ETA(2))
KA = THETA(3)
Q = THETA(4)*(WT/70)**0.75
V3 = THETA(5)*(WT/70)*EXP(ETA(3))
ALAG1 = THETA(6)*EXP(ETA(4))
S2 = V2/1000
S3 = V3/1000
K20 = CL/V2
K23 = Q/V2
K32 = Q/V3
$DES
DADT(1) = -KA*A(1)
DADT(2) = KA*A(1) - (K20 + K23)*A(2) + K32*A(3)
DADT(3) = K23*A(2) - K32*A(3)
DADT(4) = A(2)
$ERROR
AUC = A(4)/S2
IPRED = F
W = SQRT(THETA(7)**2*IPRED**2 + THETA(8)**2)
Y = IPRED + W*EPS(1)
IRES = DV-IPRED

```

---

---

```

IWRES = IRES/W
$THETA
(0, 10.9) ; CL
(0, 437) ; V2
(0, 1.15) ; KA
(0, 45.1) ; Q
(0, 1390) ; V3
(0, 0.389) ; ALAG1
(0, 0.27) ; Prop.RE (sd)
(0, 2.77) ; Add.RE (sd)
$OMEGA
(0.161) ; IIV CL
(0.232) ; IIV V2
(0.715) ; IIV V3
(0.0359) ; IIV ALAG1
$SIGMA
1 FIX ; Error PK
$SIM (12345) (54321) ONLYSIM NSUB=1
$TABLE ID TIME DV MDV IPRED CP CWRES AGE SEX WT HT BMI HCT CMT AUC ONEHEADER
NOPRINT
FILE=sdtab0033

```

---

**Table S14.** NONMEM control stream file for the simulation of remdesivir concentrations in plasma.

---

```

$PROBLEM PK
$INPUT ID TIME DV MDV CMT RATE AGE SEX WT HT BMI HCT AMT II ADDL
$DATA Remdesivir_children_sim_5mgkg_final_mM.csv IGNORE=@
$SUBROUTINES ADVAN6 TOL=3
$MODEL COMP=(PARENT) COMP=(NUC) COMP=(NUC2) COMP=(AUC)
$ABBREVIATED COMRES=1
$PK
CLM = THETA(1)*(WT/7.7)**0.75*EXP(ETA(1))
CL = THETA(2)
CL20 = THETA(3)*(WT/7.7)**0.75*EXP(ETA(2))
V1 = THETA(4)*(WT/7.7)*EXP(ETA(3))
V2 = THETA(5)*(WT/7.7)*EXP(ETA(4))
Q = THETA(6)*(WT/7.7)**0.75
V3 = THETA(7)*(WT/7.7)
KM = CLM/V1
KE = CL/V1
K20 = CL20/V2
K23 = Q/V2
K32 = Q/V3
S1 = V1
S2 = V2

```

---

---

D1 = 0.5  
\$DES  
DADT(1) = - KM\*A(1) - KE\*A(1) ; Parent compartment [microM]  
DADT(2) = KM\*A(1) - K23\*A(2) + K32\*A(3) - K20\*A(2) ; Metabolite compartment [microM]  
DADT(3) = K23\*A(2) - K32\*A(3)  
DADT(4) = A(2)  
CMET = A(2)/S2  
IF (CMET.GT.COM(1)) COM(1)=CMET  
\$ERROR  
IF (CMT.EQ.1) IPRED = A(1)/S1  
IF (CMT.EQ.2) IPRED = A(2)/S2  
Y = IPRED\*(1 + EPS(1))  
CMAX = COM(1)  
AUC = A(4)/S2  
\$THETA  
(0, 68.5) ; CLM  
(0) FIX ; CL  
(0, 13.6) ; CL20  
(0, 32.1) ; V1  
(0, 74.3) ; V2  
(0, 22.7) ; Q  
(0, 78.6) ; V3  
\$OMEGA  
0.1 FIX  
0.1 FIX  
0.1 FIX  
0.1 FIX  
\$SIGMA  
0.0187  
\$SIM (12345) (54321) ONLYSIM  
\$TABLE ID TIME DV CMT IPRED CWRES MDV CMAX AUC CLM CL20 Q V1 V2 V3 WT FILE=sdtab0033  
NOPRINT ONEHEADER

---

## References

1. Höglund, R.; Moussavi, Y.; Ruengweerayut, R.; Cheomung, A.; Äbelö, A.; Na-Bangchang, K. Population pharmacokinetics of a three-day chloroquine treatment in patients with *Plasmodium vivax* infection on the Thai-Myanmar border. *Malar. J.* **2016**, *15*, 1–9, doi:10.1186/s12936-016-1181-1.
2. Carmichael, S.J., B. Charles, and S.E. Tett, Population pharmacokinetics of hydroxychloroquine in patients with rheumatoid arthritis. *Ther. Drug Monit.* **2003**, *25*, 671–681.
3. Chhonker, Y.S.; Sleightholm, R.L.; Li, J.; Oupický, D.; Murry, D.J. Simultaneous quantitation of hydroxychloroquine and its metabolites in mouse blood and tissues using LC–ESI–MS/MS: An application for pharmacokinetic studies. *J. Chromatogr. B* **2018**, *1072*, 320–327, doi:10.1016/j.jchromb.2017.11.026.
4. Lim, H.-S.; Im, J.-S.; Cho, J.-Y.; Bae, K.-S.; Klein, T.A.; Yeom, J.-S.; Kim, T.-S.; Choi, J.-S.; Jang, I.-J.; Park, J.-W. Pharmacokinetics of Hydroxychloroquine and Its Clinical Implications in Chemoprophylaxis against Malaria Caused by *Plasmodium vivax*. *Antimicrob. Agents Chemother.* **2009**, *53*, 1468–1475, doi:10.1128/aac.00339-08.
5. Ursing, J., et al., Chloroquine is grossly underdosed in young children with malaria: Implications for drug resistance. *PLOS ONE*, **2014**, *9*, e86801, doi:10.1371/journal.pone.0086801.
6. Smit, C., et al., Chloroquine for SARS-CoV-2: Implications of its unique pharmacokinetic and safety properties. *Clin. Pharmacokinet.* **2020**, *59*, 659–669, doi: 10.1007/s40262-020-00891-1.
7. Humeniuk, R.; Mathias, A.; Kirby, B.J.; Lutz, J.D.; Cao, H.; Osinusi, A.; Babusis, D.; Porter, D.; Wei, X.; Ling, J.; et al. Pharmacokinetic, Pharmacodynamic, and Drug-Interaction Profile of Remdesivir, a SARS-CoV-2 Replication Inhibitor. *Clin. Pharmacokinet.* **2021**, *60*, 569–583, doi:10.1007/s40262-021-00984-5.
8. Reckers, A.; Wu, A.H.B.; Ong, C.M.; Gandhi, M.; Metcalfe, J.; Gerona, R. A combined assay for quantifying remdesivir and its metabolite, along with dexamethasone, in serum. *J. Antimicrob. Chemother.* **2021**, *76*, 1865–1873, doi:10.1093/jac/dkab094.
